# Supplementary material
Source: Springer Nature journal article supplement (https://www.springermedizin.de/resource/supplementary/12959_2013_182_MOESM4_ESM.pdf/9569220)

**A**

## Symmetrical plate layout

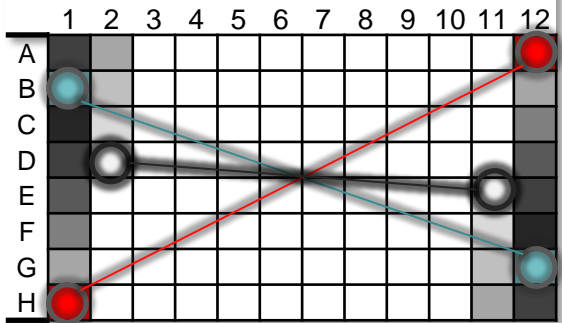**B**

## Averaged symmetrical rows and columns

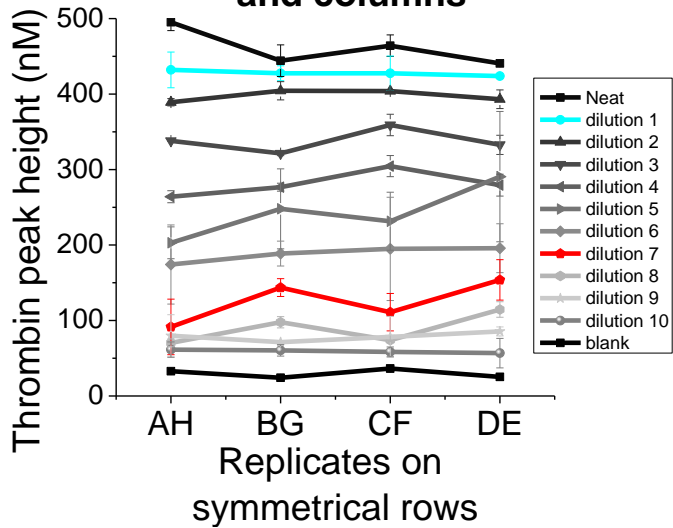

Supplement: MOESM4 [file 9569220]
